# Supplementary material
Source: PubMed Central journal article supplement (PMC3498580)

## **Supplementary Figure Legends**

**Supplementary Figure 1.** SNCA mice die between the ages of 6 and 11 months. Survival plots for wild type (WT) and SNCA mice (n = 16 mice/group).

**Supplementary Figure 2.** Body weights of wild type (WT) and SNCA mutant mice maintained on control, high calorie (HCD) and intermittent fasting (IF) diets. Values are the mean and SE (n = 12 mice per group).

**Supplementary Figure 3.** Food intakes of wild type (WT) and SNCA mutant mice maintained on control, high calorie (HCD) and intermittent fasting (IF) diets. Values are the mean and SE (n = 12 mice per group).

**Supplementary Figure 4.** To examine heart rate control, SNCA mice were subjected to one hour of restraint stress. (A) AL SNCA mice failed to elevate their heart rate during restraint stress. (B) The change in heart rate during restraint stress revealed that SNCA mice do not elevate their heart rate during restraint stress. Values are the mean and SE (n = 8 mice per group).

Supplementary Fig. 1

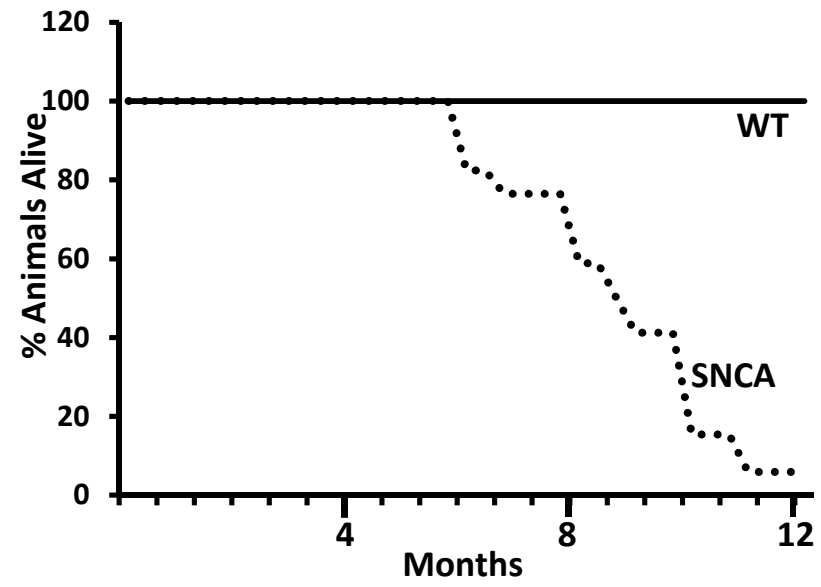

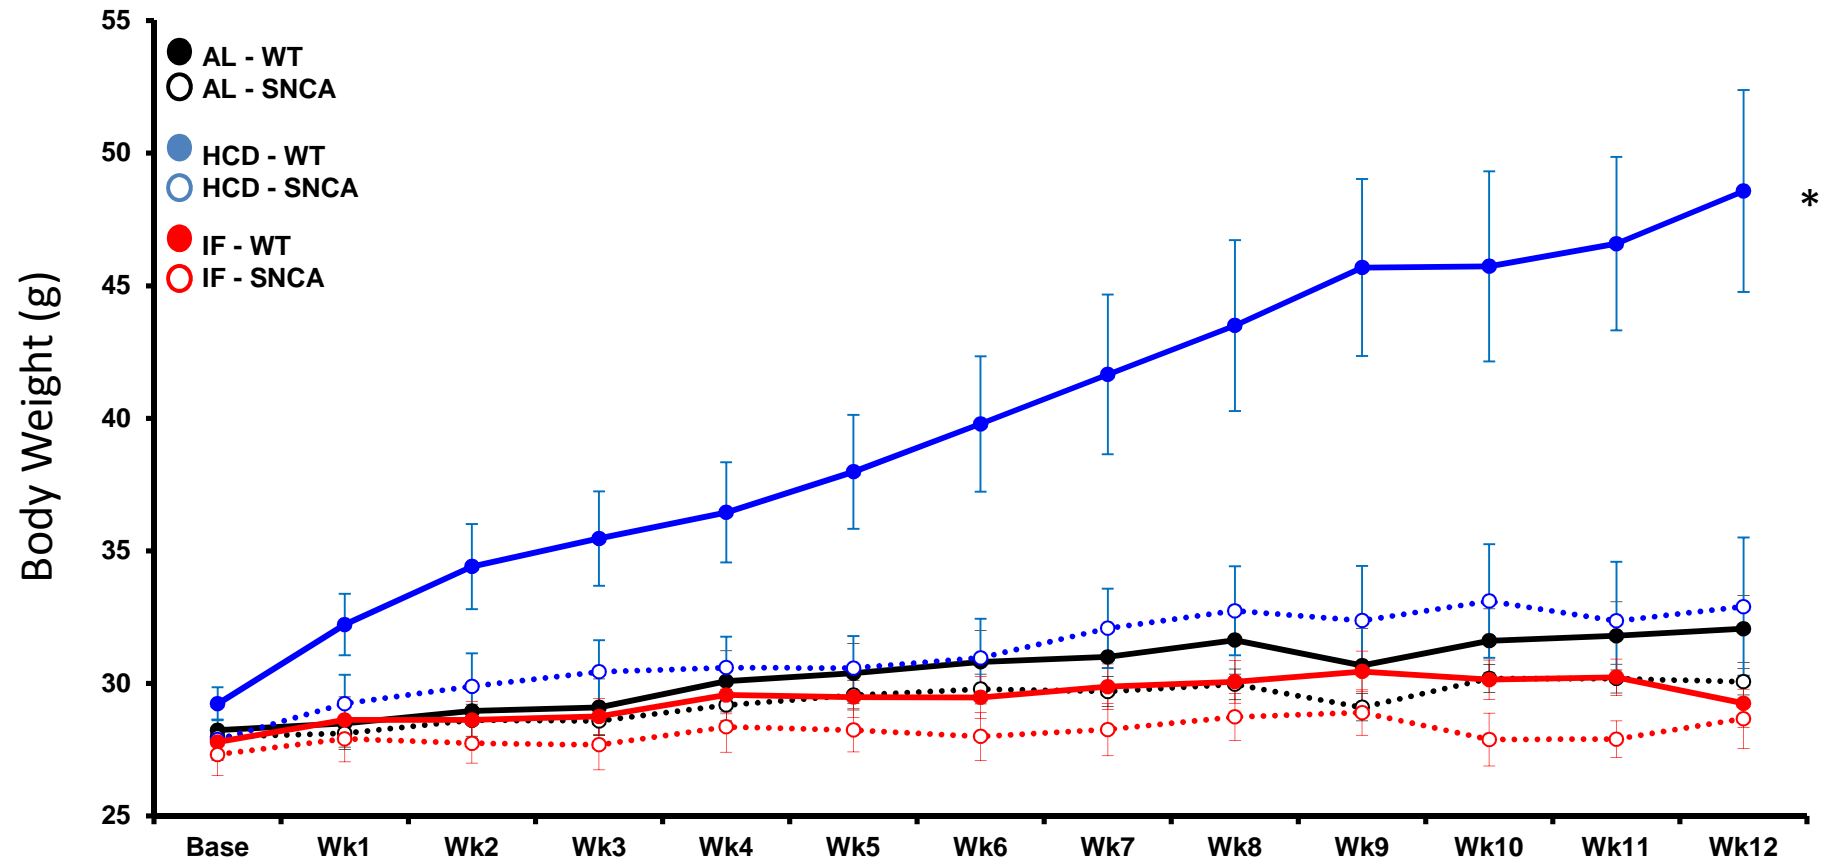

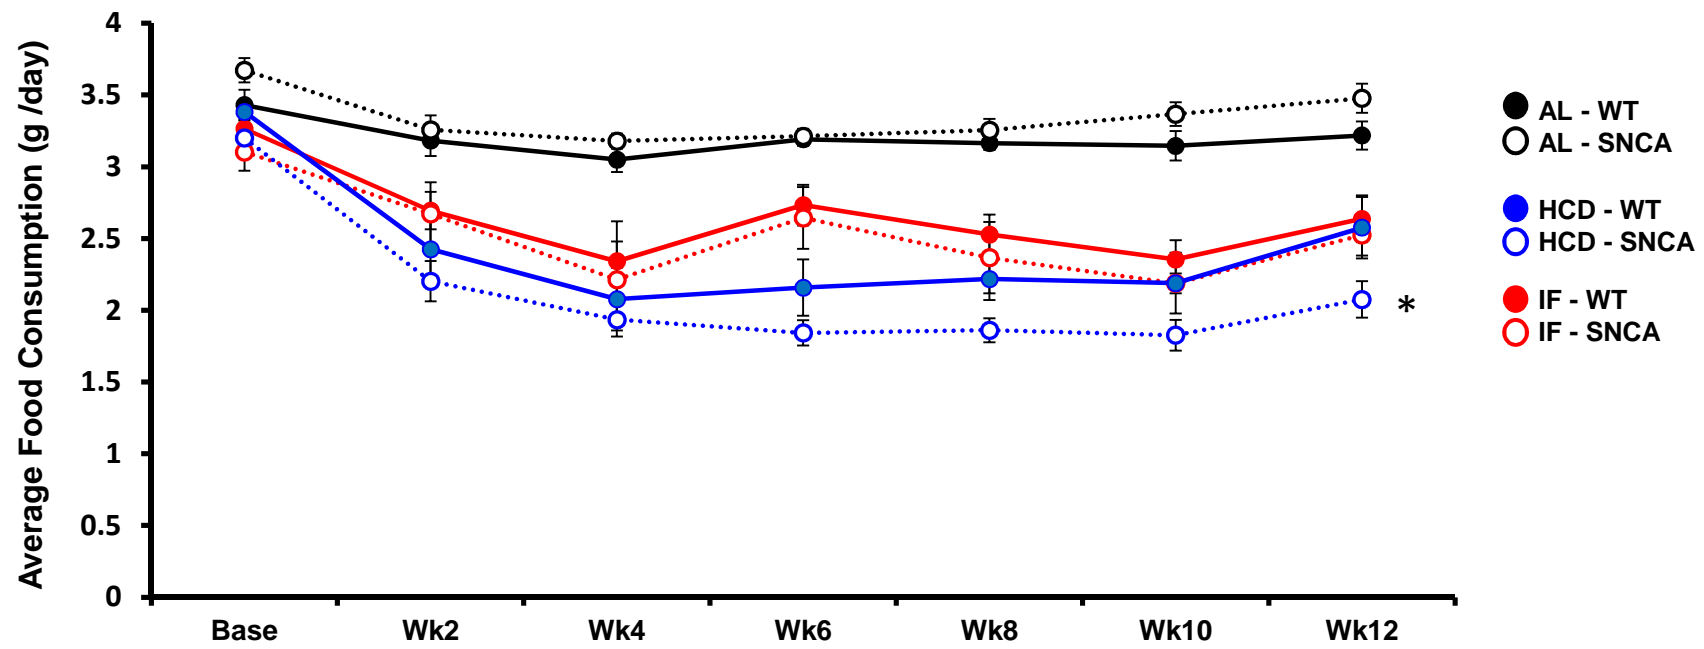

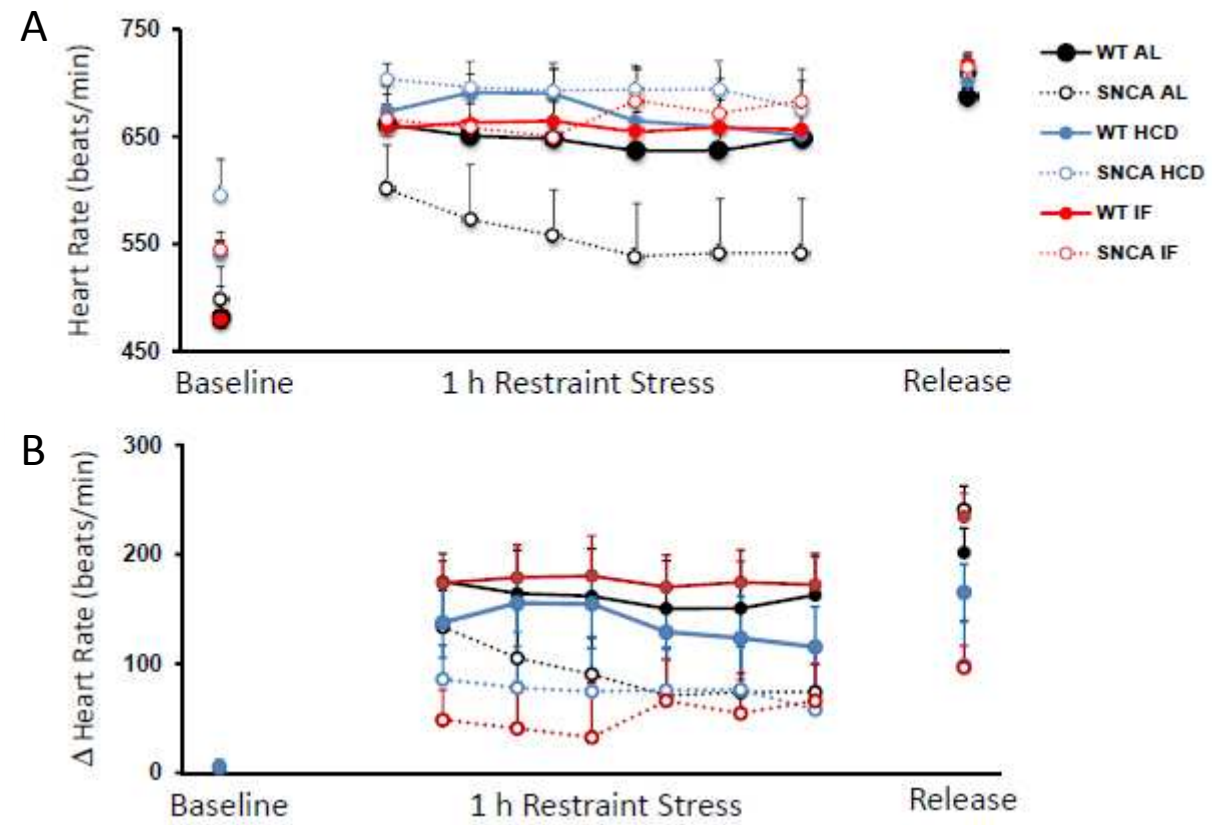

Supplement: NIHMS394372-supplement-01.pdf [file NIHMS394372-supplement-01.pdf]
